# Supplementary material
Source: Springer Nature journal article supplement (https://www.springermedizin.de/resource/supplementary/12961_2013_287_MOESM2_ESM.pdf/9570966)

Number of documents

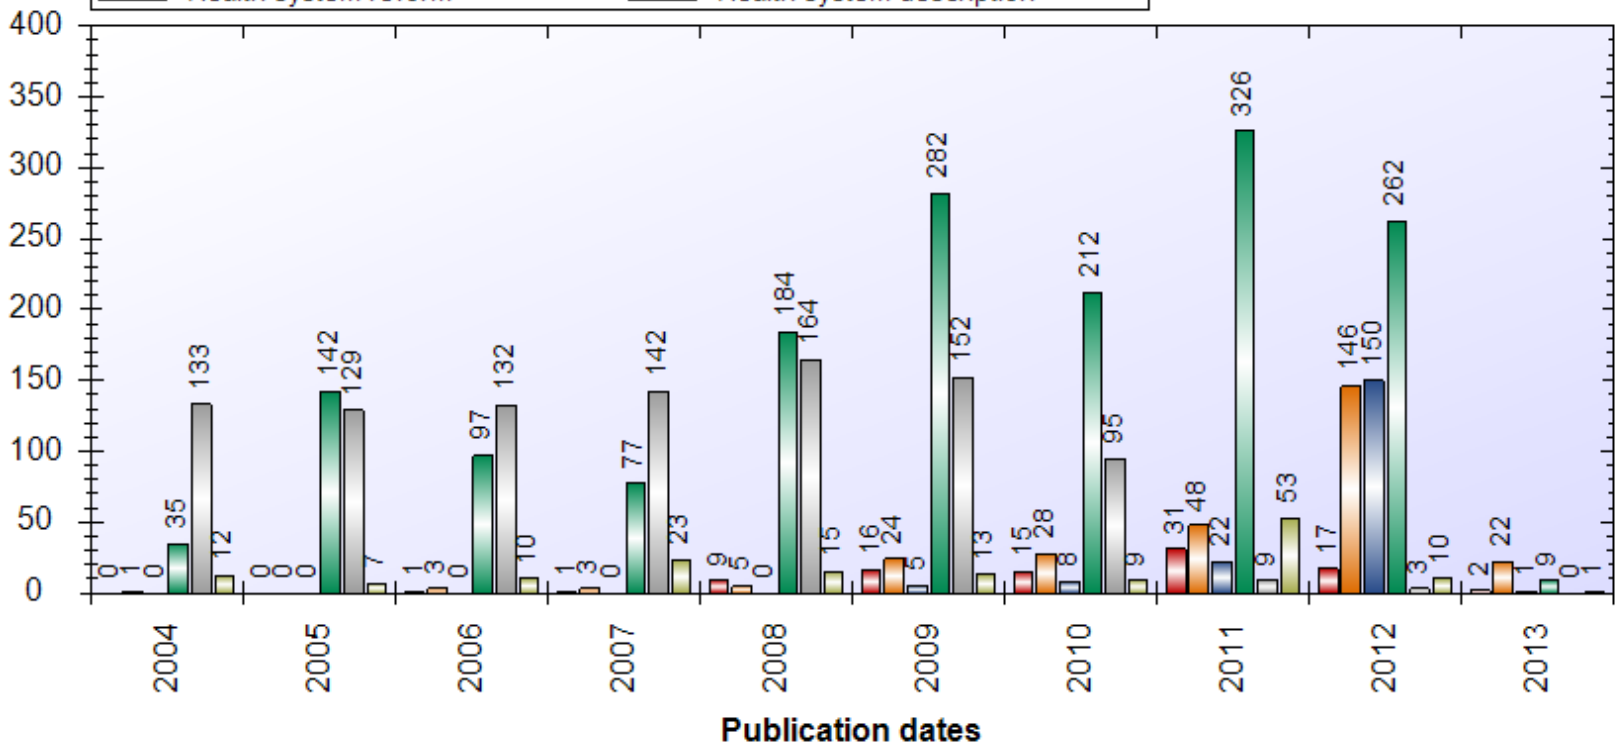

Supplement: MOESM2 [file 9570966]
